# Supplementary material
Source: PubMed Central journal article supplement (PMC8028967)
Supplement: BPA-27-411-s001.pdf [file BPA-27-411-s001.pdf]

**Supplementary Table 1: Characteristics of the AT/RT control group.** Characteristics of 30 patients harboring AT/RT that were employed for as controls for clustering analyses and molecular profiling (WT: wildtype).

| #ID | Molecular subgroup (Cancer Cell 2016 PMID 26923874) | Age at diagnosis (months) | Sex    | Tumor location | Copy number alterations on analysis of 450k data | SMARCB1 region FISH   | SMARCB1 region MLPA                      | SMARCB1 sequencing        | SMARCB1 germ line status  |
|-----|-----------------------------------------------------|---------------------------|--------|----------------|--------------------------------------------------|-----------------------|------------------------------------------|---------------------------|---------------------------|
| 32  | TYR                                                 | 10                        | female | supratentorial | 22q deletion                                     | heterozygous deletion | not available                            | c.511insC (Exon 5)        | WT                        |
| 54  | TYR                                                 | 84                        | female | supratentorial | 22q deletion                                     | not available         | not available                            | not available             | WT                        |
| 57  | TYR                                                 | 17                        | male   | infratentorial | 22q deletion                                     | heterozygous deletion | not available                            | not available             | not available             |
| 66  | TYR                                                 | 3                         | female | infratentorial | 22q deletion                                     | heterozygous deletion | not available                            | c.825_838del14bp (Exon 7) | c.825_838del14bp (Exon 7) |
| 79  | TYR                                                 | 6                         | male   | supratentorial | 22q deletion                                     | heterozygous deletion | delTBX1_NIPSNAP1 + delEx6 SMARCB1        | WT                        | delEx6                    |
| 81  | TYR                                                 | 20                        | female | infratentorial | 22q deletion                                     | heterozygous deletion | delTBX1_NIPSNAP1 + delEx1-7 SMARCB1      | WT                        | not available             |
| 108 | TYR                                                 | 105                       | male   | supratentorial | 22q deletion                                     | heterozygous deletion | heterozygous deletion (delGNAZ_SMARCB1)  | WT                        | not available             |
| 145 | TYR                                                 | 2                         | male   | infratentorial | 22q deletion                                     | heterozygous deletion | heterozygous deletion (delTBX1_NIPSNAP1) | c.472C>T (Exon 4)         | WT                        |
| 165 | TYR                                                 | 19                        | female | infratentorial | 22q deletion                                     | heterozygous deletion | heterozygous deletion (delTBX1_NIPSNAP1) | c.1148delC (Exon 9)       | not available             |
| 168 | TYR                                                 | 12                        | male   | supratentorial | 22q deletion                                     | heterozygous deletion | delPPL2_NIPSNAP1 + delEx8_Ex9 SMARCB1    | WT                        | delEx8_Ex9                |

| #ID | Molecular subgroup (Cancer Cell 2016 PMID 26923874) | Age at diagnosis (months) | Sex    | Tumor location | Copy number alterations on analysis 450k data | SMARCB1 region FISH | SMARCB1 region MLPA                     | SMARCB1 sequencing           | SMARCB1 germ line status  |
|-----|-----------------------------------------------------|---------------------------|--------|----------------|-----------------------------------------------|---------------------|-----------------------------------------|------------------------------|---------------------------|
| 21  | SHH                                                 | 24                        | female | supratentorial | 22q deletion                                  | homozygous deletion | not available                           | not available                | not available             |
| 61  | SHH                                                 | 12                        | female | infratentorial | absent                                        | WT                  | not available                           | homozygous c.157C>T (Exon 2) | c.157C>T p.R53X (Exon 2). |
| 71  | SHH                                                 | 21                        | female | infratentorial | absent                                        | homozygous deletion | not available                           | WT                           | WT                        |
| 76  | SHH                                                 | 6                         | male   | infratentorial | absent                                        | WT                  | heterozygous deletion (delTBX1_SMARCB1) | c.157C>T (Exon 2)            | not available             |
| 80  | SHH                                                 | 10                        | male   | infratentorial | absent                                        | WT                  | homozygous deletion (delEx1)            | WT                           | WT                        |

|     |     |    |        |                |                                   |                       |                                 |                             |               |
|-----|-----|----|--------|----------------|-----------------------------------|-----------------------|---------------------------------|-----------------------------|---------------|
| 103 | SHH | 10 | female | supratentorial | absent                            | WT                    | WT                              | c.601C>T (Exon 5)           | not available |
| 115 | SHH | 24 | male   | supratentorial | 22q deletion                      | heterozygous deletion | delSMARCB1<br>+delEx4-5 SMARCB1 | WT                          | not available |
| 118 | SHH | 1  | female | infratentorial | absent                            | WT                    | WT                              | homozygous c141C>A (Exon 2) | WT            |
| 173 | SHH | 24 | female | supratentorial | absent                            | heterozygous deletion | not available                   | not available               | not available |
| 194 | SHH | 17 | female | supratentorial | 22q deletion affecting<br>SMARCB1 | heterozygous deletion | not available                   | not available               | not available |

| #ID | Molecular subgroup<br>(Cancer Cell 2016 PMID<br>26923874) | Age at<br>diagnosis<br>(months) | Sex    | Tumor location | Copy number alterations<br>on analysis 450k data | SMARCB1 region FISH   | SMARCB1 region MLPA                    | SMARCB1 sequencing | SMARCB1 germ line status |
|-----|-----------------------------------------------------------|---------------------------------|--------|----------------|--------------------------------------------------|-----------------------|----------------------------------------|--------------------|--------------------------|
| 25  | MYC                                                       | 4                               | female | supratentorial | homozygous deletion<br>affecting SMARCB1         | no signals            | delEx1-9 SMARCB1                       | WT                 | not available            |
| 43  | MYC                                                       | 23                              | female | supratentorial | homozygous deletion<br>affecting SMARCB1         | heterozygous deletion | not available                          | WT                 | not available            |
| 59A | MYC                                                       | 8                               | male   | supratentorial | homozygous deletion<br>affecting SMARCB1         | homozygous deletion   | not available                          | WT                 | WT                       |
| 60  | MYC                                                       | 9                               | male   | not available  | homozygous deletion<br>affecting SMARCB1         | homozygous deletion   | not available                          | WT                 | WT                       |
| 77  | MYC                                                       | 27                              | male   | supratentorial | homozygous deletion<br>affecting SMARCB1         | homozygous deletion   | delEx1-9 SMARCB1                       | WT                 | WT                       |
| 104 | MYC                                                       | 36                              | female | spinal         | homozygous deletion<br>affecting SMARCB1         | homozygous deletion   | delEx1-9 SMARCB1                       | WT                 | not available            |
| 105 | MYC                                                       | 67                              | male   | supratentorial | homozygous deletion<br>affecting SMARCB1         | homozygous deletion   | homozygous delEx1-9 SMARCB1            | WT                 | not available            |
| 153 | MYC                                                       | 28                              | female | supratentorial | homozygous deletion<br>affecting SMARCB1         | homozygous deletion   | delTBX1_NIPSNAP1<br>+ delEx1-9 SMARCB1 | WT                 | not available            |
| 157 | MYC                                                       | 23                              | male   | infratentorial | homozygous deletion<br>affecting SMARCB1         | homozygous deletion   | delGNAZ_SMARCB1<br>+ delEx1-9 SMARCB1  | WT                 | not available            |
| 167 | MYC                                                       | 11                              | female | supratentorial | homozygous deletion<br>affecting SMARCB1         | homozygous deletion   | homozygous delEx1-9 SMARCB1            | WT                 | WT                       |
